# Supplementary material for: ATP-dependent nucleosome unwrapping catalyzed by human RAD51
Source: PubMed Central journal article supplement — Nucleic Acids Res. 2013 Jun 11;41(15):7302–12. doi: 10.1093/nar/gkt411 (PMC3753615; doi:10.1093/nar/gkt411), 2013-06-11
Supplement: supp_gkt411_nar-02680-d-2012-File009.pdf [file supp_gkt411_nar-02680-d-2012-File009.pdf]

## SUPPLEMENTARY MATERIAL

### ATP-dependent Nucleosome Unwrapping Catalyzed by human RAD51

Justin A. North, Ravindra Amunugama, Marcelina Klajner, Aaron N. Bruns, Michael G. Poirier  
and Richard Fishel

#### Supplemental Table 1: PCR Primers

601D forward: CTGGAGAATCCCGGTGCCGA  
601D reverse: ACAGGATGTATATATCTGACACGTGCCTGGAGACTAGGG  
AGTAATCCCCTTGGCGGTTAAAACGCGG(T-Cy3)GGACA  
601E forward: Cy3-CTGGAGAATCCCGGTGCCGA  
601E reverse: ACAGGATGTATATATCTGACACGTGCCTGGAGACTA  
5SD forward: GTACTAATACTGTATGAGCATAACAGTACTTCCG  
5SD reverse: CTGGCATGGGGAGGAGCTGGGCCCCCCCAGAAGGCAGCA  
CAAGGGGAGGAAAAGTCAGCCTTGTGC(TCy3)CGC  
5SE forward: Cy3-GTACTAATACTGTATGAGCATAACAGTACTTCCG  
5SE reverse: CTGGCATGGGGAGGAGCTGG  
601-linker forward: CTGGAGAATCCCGGTGCCGAGGC  
601D-linker reverse: GCACCCCACTGTCTATACACAGGATGTATATATCTGACACGTG  
CCTGGAGACTAGGGAGTAATCCCCTTGGCGGTTAAAACGCGG(T-  
Cy3)GG  
601E-linker reverse: TGCCTCCGCACCCCACTGTCTATACACA(T-Cy3)GATGTATA  
linker forward: CCTGTGTATAGACAGTGGGGTGCGGAGGCG  
linker reverse: CACGTGTGGGGGCCCGAGCTCGCGGC

## SUPPLEMENTARY FIGURE LEGENDS

**Supplementary Figure 1. Assembly of Nucleosomes. A)** Agarose gel analysis of assembled nucleosomes using 601E, 601D, 5SE, 5SD, 601E-linker, and 601D-linker nucleosome positioning DNAs (see Fig. 1A). Nucleosome (Nuc) mobility and free DNA (DNA) mobility are marked on the left. **B)** Crystal structure of a nucleosome (Lugar et al., *Nature* 389:6648, 1997) showing the relative positions of the entry-exit (601E, left) and dyad (601D, right) Cy3 fluorophore relative to the Cy5 fluorophore linked to H2A(K119C) within the histone octamer.

**Supplementary Figure 2. Nucleosome disassembly by HsRAD51(D316K). A)**

Representative fluorescence emission spectra of 601E-linker nucleosomes (2 nM) excited at 510nm in the presence 130mM KCl, ATP (250  $\mu$ M) and 2mM MgCl<sub>2</sub> (Mg<sup>+2</sup>) with HsRAD51(D316K) at 0nM (black), 100nM (blue), 200nM (green), 500nM (orange) and 900nM (purple). **D)** Representative fluorescence emission spectra of 601D-linker nucleosomes (2 nM) excited at 510 nM in the presence 130 mM KCl, ATP (250  $\mu$ M) and 2 mM CaCl<sub>2</sub> (Ca<sup>+2</sup>) with HsRAD51 at 0 nM (black), 100 nM (blue), 200 nM (green), 500nM (orange) and 900nM (purple).

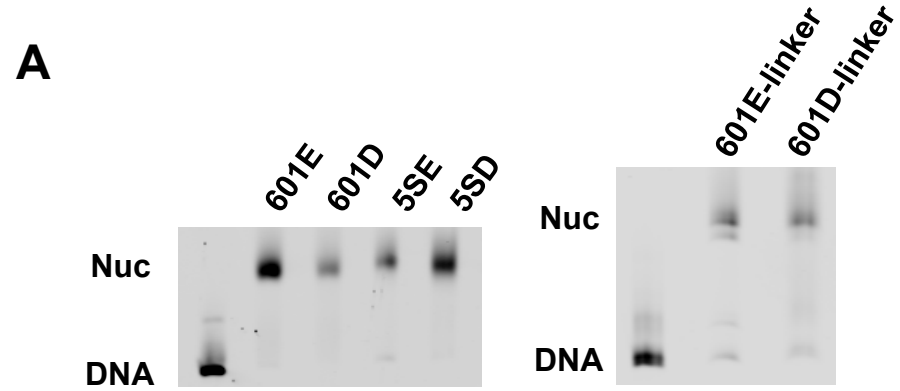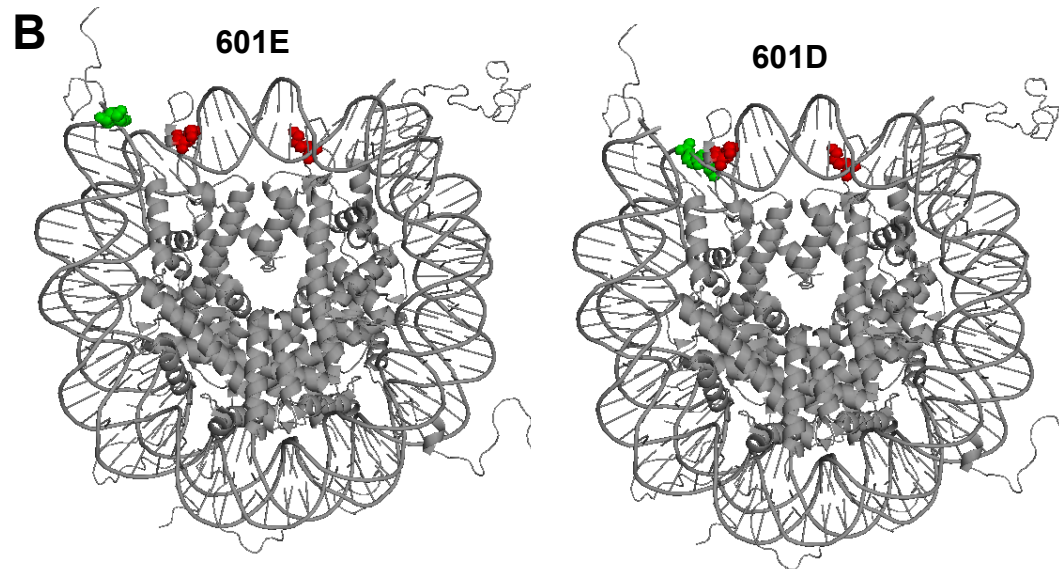

Figure S1

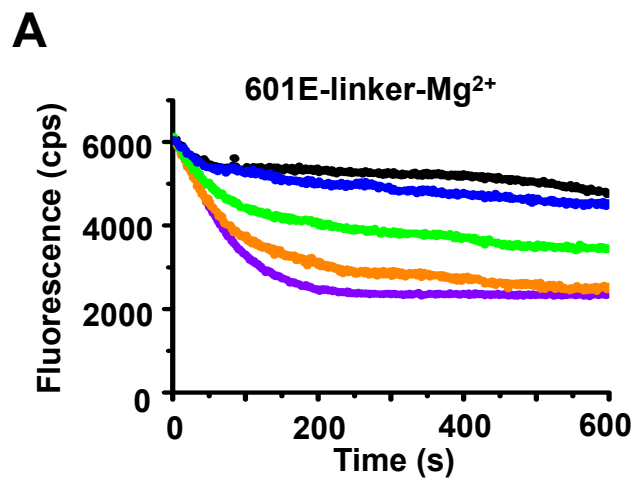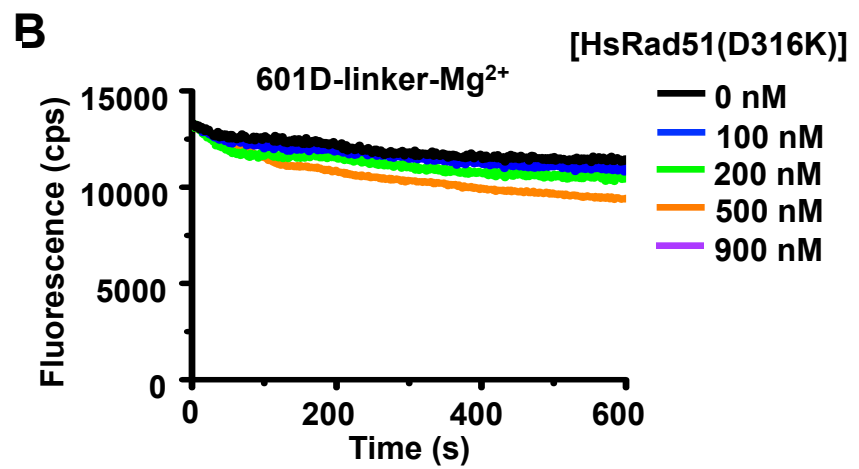

Figure S2
